# Supplementary material for: Blood-Based Transcriptomic Biomarkers Are Predictive of Neurodegeneration Rather Than Alzheimer’s Disease
Source: MDPI journal article supplement (doi:10.3390/ijms241915011), 2023-10-09
Supplement: s1 [file s1]

Blood-based transcriptomic biomarkers are predictive of neurodegeneration rather than Alzheimer's disease

Artur Shvetcov <sup>1,2</sup>, Shannon Thomson <sup>3,4</sup>, Jessica Spathos <sup>3</sup>, Ann-Na Cho <sup>5</sup>, Heather M. Wilkins <sup>6,7,8</sup>, Shea J. Andrews <sup>9</sup>, Fabien Delerue <sup>10</sup>, Timothy A. Couttas <sup>11</sup>, Jasmeen Kaur Isaar <sup>12,13,14</sup>, Finula Isik <sup>3,4</sup>, Simran Kaur <sup>15,16</sup>, Eleanor Drummond <sup>4,17</sup>, Carol Dobson-Stone <sup>4,17</sup>, Shantel L. Duffy <sup>18</sup>, Natasha M. Rogers <sup>19,20,21</sup>, Daniel Catchpoole <sup>22,23</sup>, Wendy A. Gold <sup>4,12,13</sup>, Russell H. Swerdlow <sup>6,7,8,24</sup>, David A. Brown <sup>3,21,25</sup>, & Caitlin A. Finney <sup>3,4\*</sup>

## Supplementary Figures

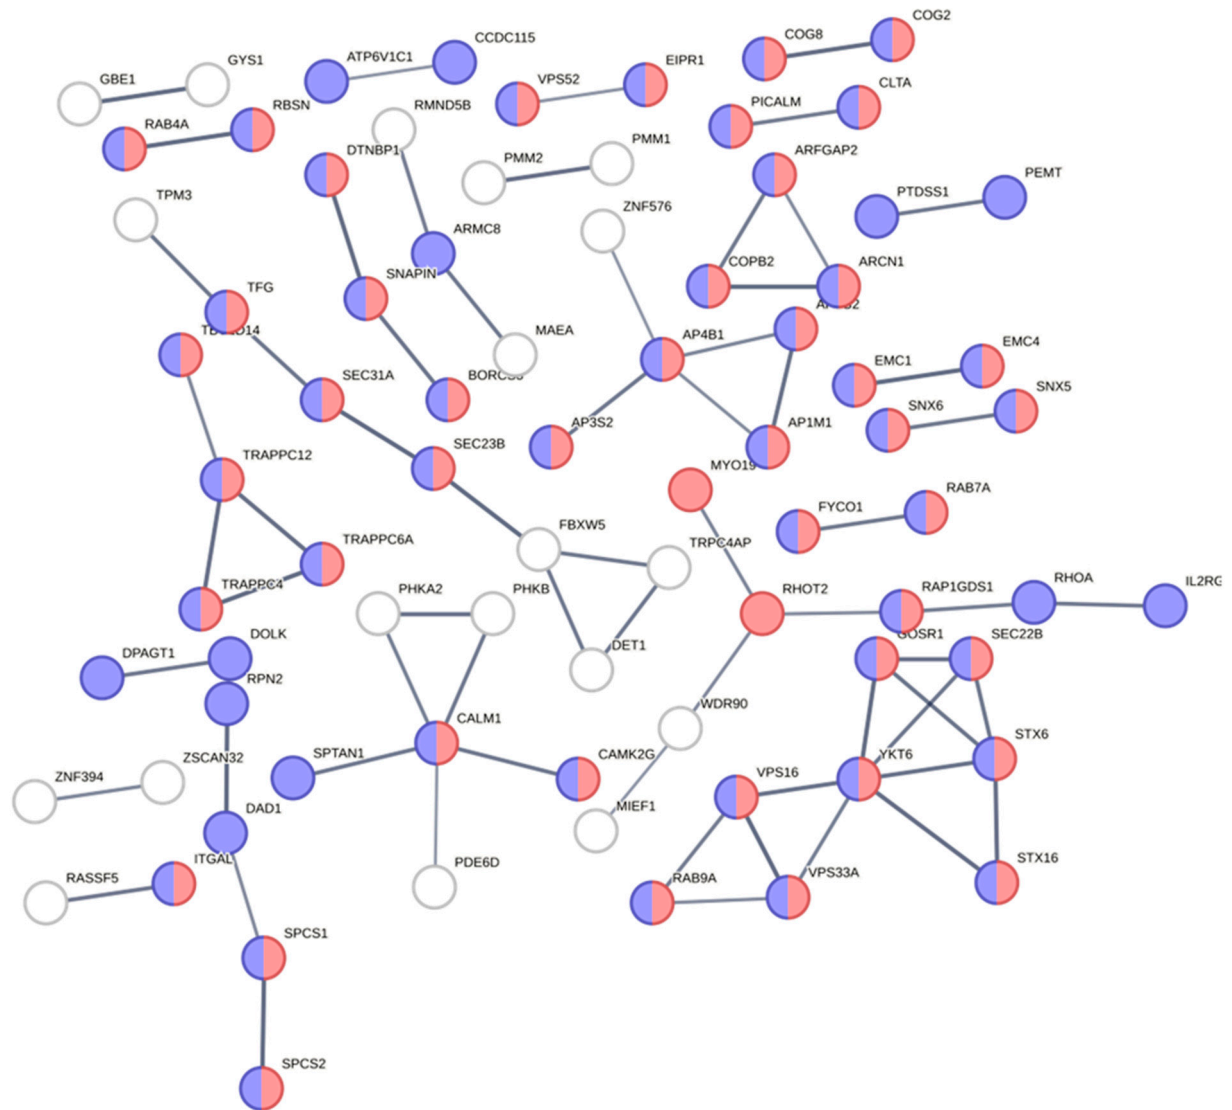

**Supplementary Figure S1.** Characterization of the biological function and cellular localization of component 1 (PC1) k-means cluster 1 (red) using Gene Ontology and STRING. The STRING network analysis includes the following interaction sources: experiments, databases, co-expression, neighbourhood, and gene fusion. The minimum interaction score was set to 0.7 (high confidence), and disconnected nodes in the network are hidden. The thickness of the line indicates the confidence in the interaction. The red nodes indicate genes involved in cellular localization (FDR =  $3.61\text{e-}11$ ), and the blue nodes indicate cellular localization of the endomembrane system (FDR =  $6.02\text{e-}22$ ).

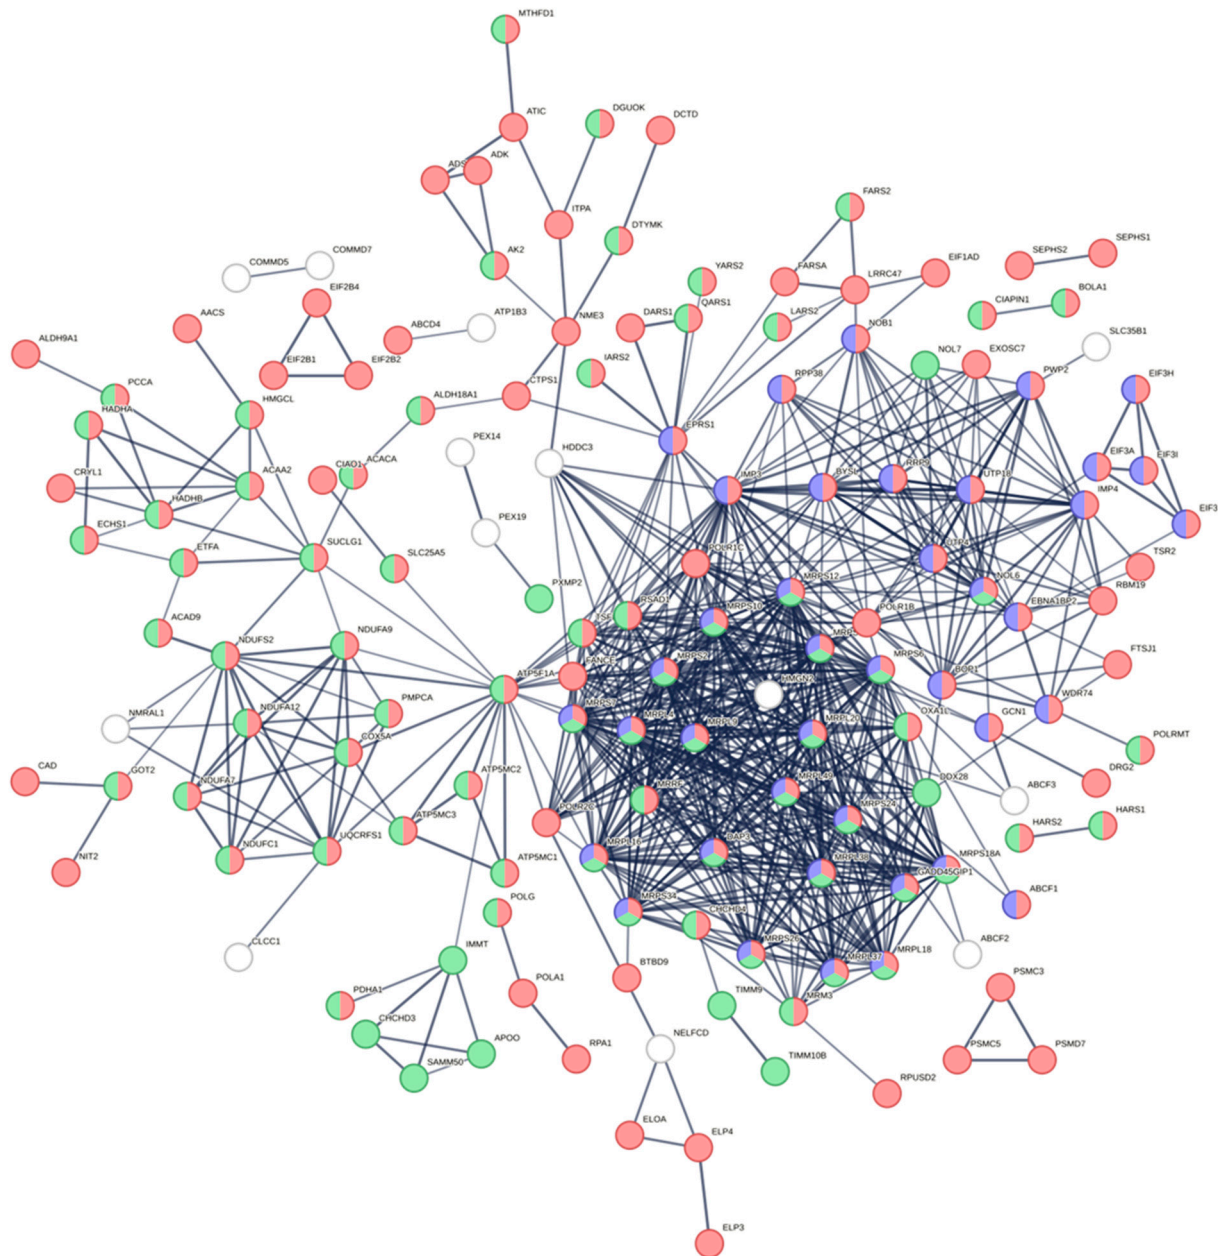

**Supplementary Figure S2.** Characterization of the biological function and cellular localization of component 1 (PC1) k-means cluster 2 (yellow) using Gene Ontology and STRING. The STRING network analysis includes the following interaction sources: experiments, databases, co-expression, neighbourhood, and gene fusion. The minimum interaction score was set to 0.7 (high confidence), and disconnected nodes in the network are hidden. The thickness of the line indicates the confidence in the interaction. The red nodes indicate genes involved in metabolic processes (FDR =  $5.29\text{e-}25$ ); the green nodes indicate cellular localization of the mitochondrion (FDR =  $2.87\text{e-}40$ ); the blue nodes indicate ribonucleoprotein complex (FDR =  $5.93\text{e-}12$ ).





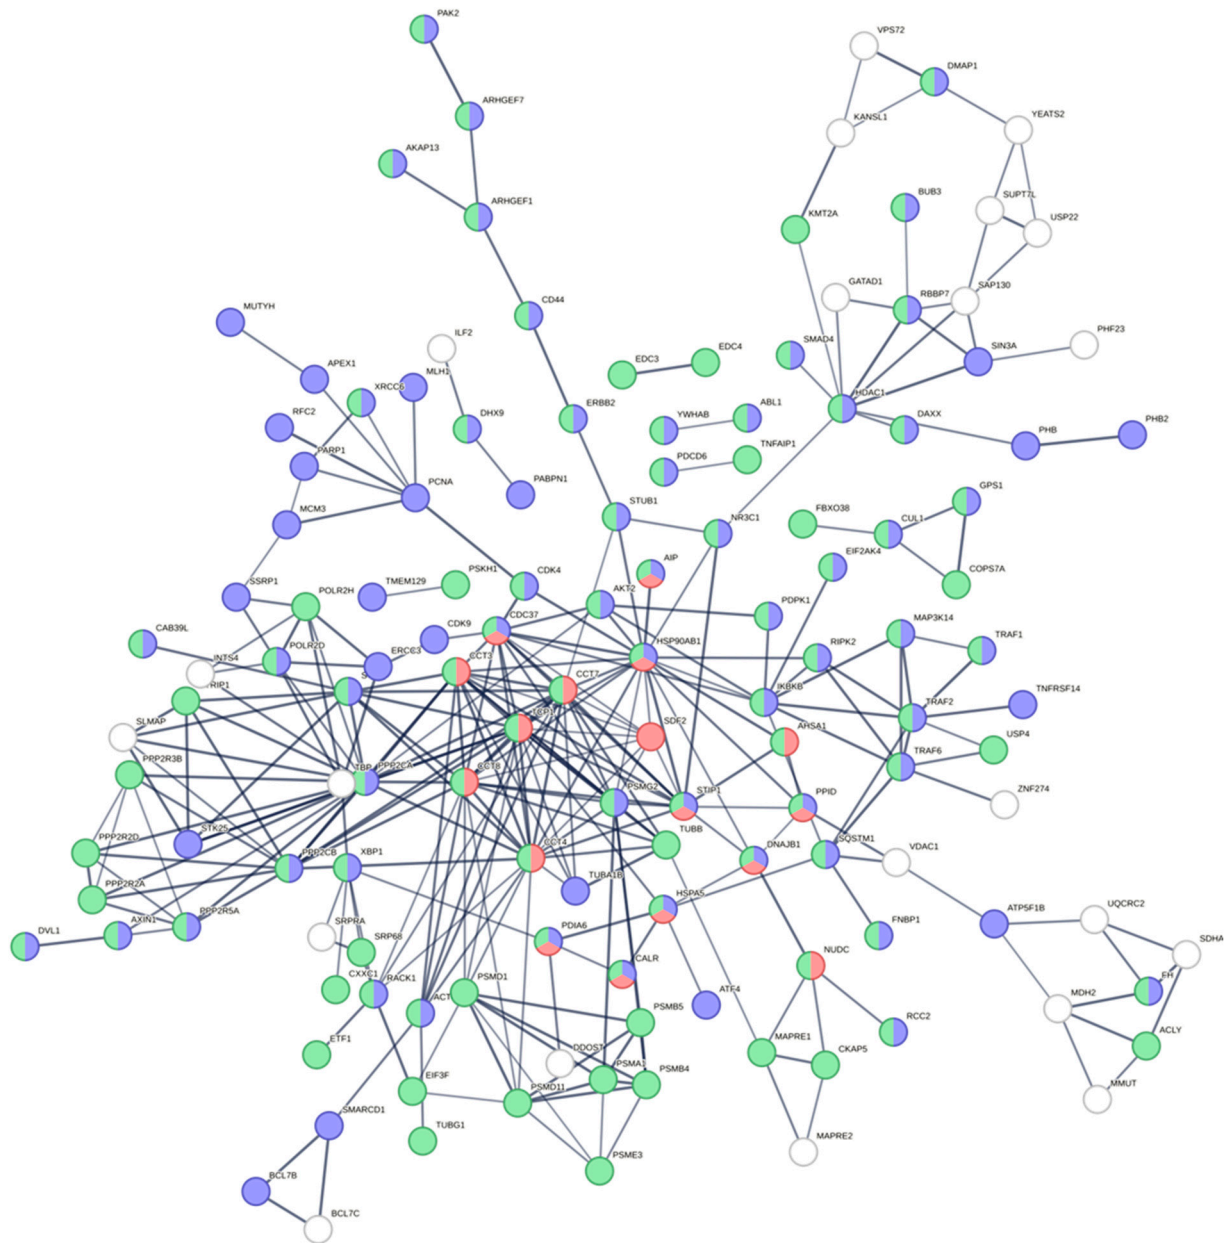

**Supplementary Figure S4.** Characterization of the biological function and cellular localization of component 1 (PC1) k-means cluster 4 (blue) using Gene Ontology and STRING. The STRING network analysis includes the following interaction sources: experiments, databases, co-expression, neighbourhood, and gene fusion. The minimum interaction score was set to 0.7 (high confidence), and disconnected nodes in the network are hidden. The thickness of the line indicates the confidence in the interaction. The red nodes indicate genes involved in protein folding (FDR =  $2.80 \times 10^{-9}$ ); the blue nodes indicate genes involved in cellular response to stimulus (FDR =  $1.69 \times 10^{-9}$ ); the green nodes indicate cellular localization of the cytosol (FDR =  $1.19 \times 10^{-16}$ ).

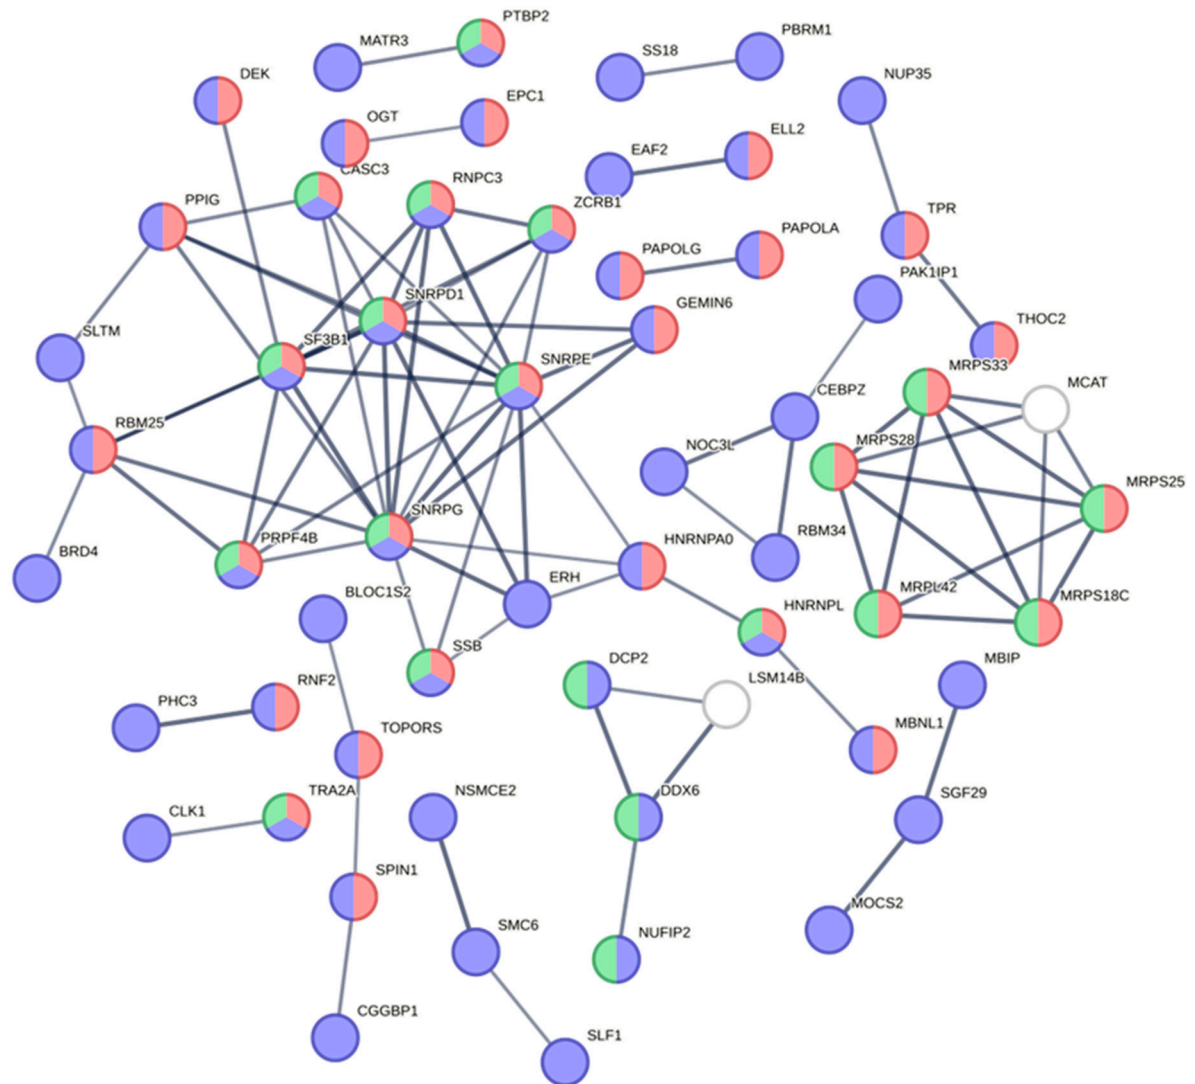

**Supplementary Figure S5.** Characterization of the biological function and cellular localization of component 1 (PC2) k-means cluster 1 (red) using Gene Ontology and STRING. The STRING network analysis includes the following interaction sources: experiments, databases, co-expression, neighbourhood, and gene fusion. The minimum interaction score was set to 0.7 (high confidence), and disconnected nodes in the network are hidden. The thickness of the line indicates the confidence in the interaction. The red nodes indicate genes involved in gene expression (FDR =  $2.32 \times 10^{-9}$ ); the blue nodes indicate cellular localization to the nucleus (FDR =  $1.83 \times 10^{-21}$ ); and the green nodes indicate cellular localization of the ribonucleoprotein complex (FDR = 0.00024).



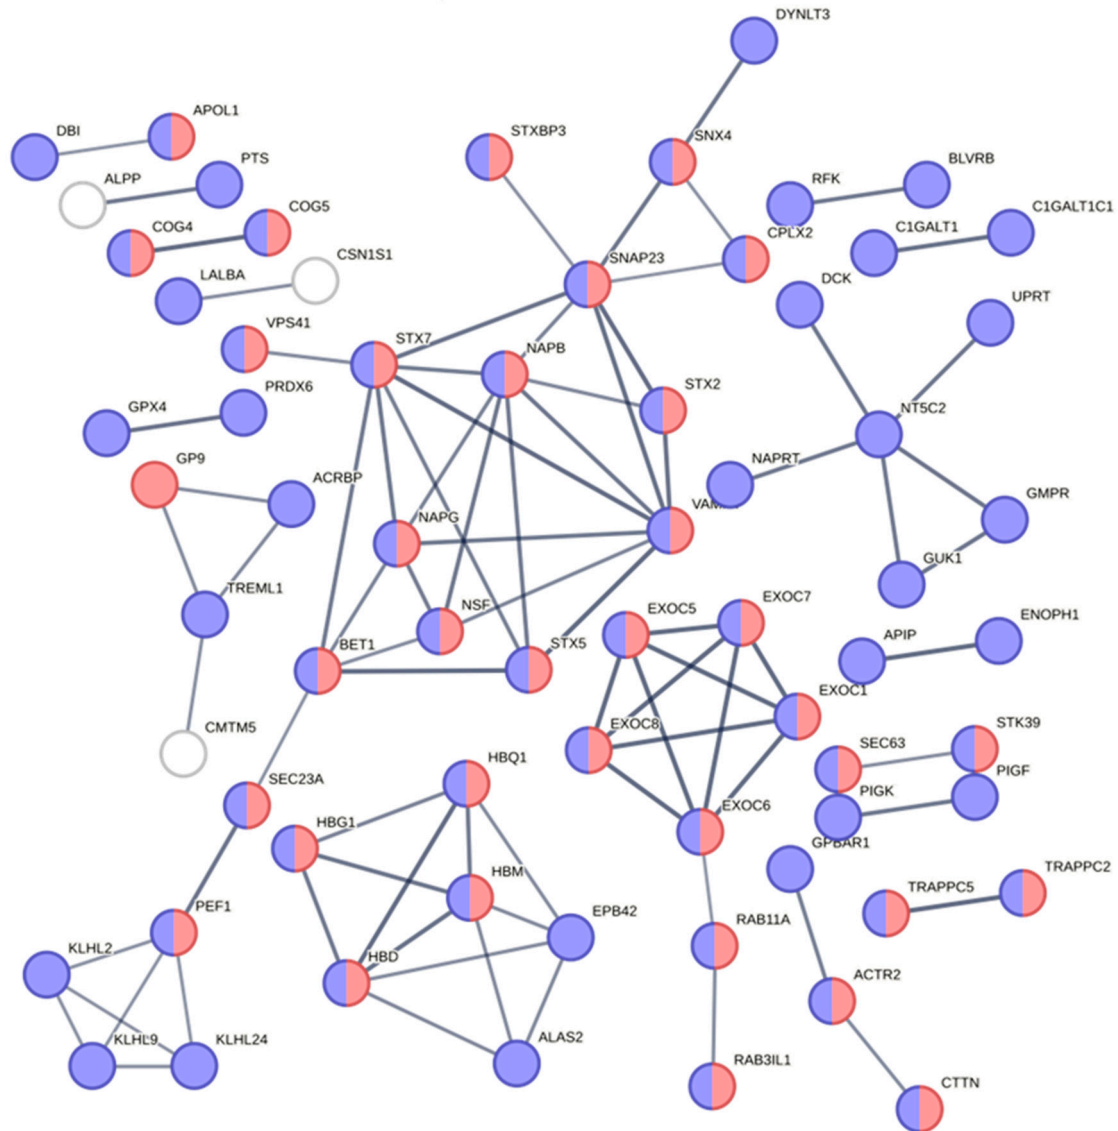

**Supplementary Figure S7.** Characterization of the biological function and cellular localization of component 1 (PC2) k-means cluster 3 (green) using Gene Ontology and STRING. The STRING network analysis includes the following interaction sources: experiments, databases, co-expression, neighbourhood, and gene fusion. The minimum interaction score was set to 0.7 (high confidence), and disconnected nodes in the network are hidden. The thickness of the line indicates the confidence in the interaction. The red nodes indicate genes involved in transport ( $FDR = 4.58e-6$ ), and the blue nodes indicate cellular localization to the cytoplasm ( $FDR = 4.19e-10$ ).
